# Supplementary material for: Green Extraction of Phenolic Acids from Artemisia argyi Leaves by Tailor-Made Ternary Deep Eutectic Solvents
Source: PubMed Central journal article supplement (PMC6695999; doi:10.3390/molecules24152842), 2019-08-05
Supplement: molecules-24-02842-s001.pdf [file molecules-24-02842-s001.pdf]

Article

# Green Extraction of Phenolic Acids from *Artemisia argyi* Leaves by Tailor-Made Ternary Deep Eutectic Solvents

Li Duan <sup>1,†</sup>, Chenmeng Zhang <sup>1,†</sup>, Chenjing Zhang <sup>1</sup>, Zijing Xue <sup>2</sup>, Yuguang Zheng <sup>2,\*</sup> and Long Guo <sup>2,\*</sup>

<sup>1</sup> College of Chemistry and Material Science, Hebei Normal University, Shijiazhuang, Hebei 050024, China

<sup>2</sup> School of Pharmacy, Hebei University of Chinese Medicine, Shijiazhuang, Hebei 050200, China

\* Correspondence: zyg314@163.com (Y.Z.); guo\_long11@163.com (L.G.); Tel.: +86-0311-89926316 (Y.Z.); +86-0311-89926316 (Y.Z.); +86-0311-89926017 (L.G.)

† These authors contributed equally to this work.

**Table S1.** The linearity, limit of detections (LODs), limit of quantifications (LOQs), precision, stability and accuracy of the four phenolic acids.

| NO. | Analytes                              | Calibration curve    | R <sup>2</sup> | Linear range<br>(µg/mL) | LODs<br>(µg/mL) | LOQs<br>(µg/mL) | Precision (RSDs, %) |                    | Repeatability | Stability     | Recovery    |        |
|-----|---------------------------------------|----------------------|----------------|-------------------------|-----------------|-----------------|---------------------|--------------------|---------------|---------------|-------------|--------|
|     |                                       |                      |                |                         |                 |                 |                     |                    | (n = 6)       | (n = 6, 24 h) | (n = 6)     |        |
|     |                                       |                      |                |                         |                 |                 | Intra-Day<br>(n=6)  | Inter-day<br>(n=9) | RSDs, %       | RSDs, %       | Recovery, % | RSD, % |
| 1   | 3-caffeoylquinic acid                 | y = 8.2847x - 1.0192 | 0.9999         | 1.40-112                | 0.66            | 1.40            | 1.52                | 2.11               | 2.54          | 1.22          | 101.90      | 1.67   |
| 2   | 3,4-di- <i>O</i> -caffeoylquinic acid | y = 9.201x - 2.3121  | 0.9999         | 1.16-93                 | 0.46            | 1.16            | 1.61                | 1.83               | 2.71          | 1.39          | 102.86      | 0.81   |
| 3   | 3,5-di- <i>O</i> -caffeoylquinic acid | y = 10.074x - 3.7888 | 0.9999         | 1.42-114                | 0.68            | 1.42            | 1.45                | 2.06               | 1.77          | 2.06          | 101.15      | 1.42   |
| 4   | 4,5-di- <i>O</i> -caffeoylquinic acid | y = 11.054x - 7.3871 | 0.9997         | 1.15-94                 | 0.42            | 1.15            | 1.23                | 2.14               | 2.41          | 1.80          | 102.60      | 1.03   |

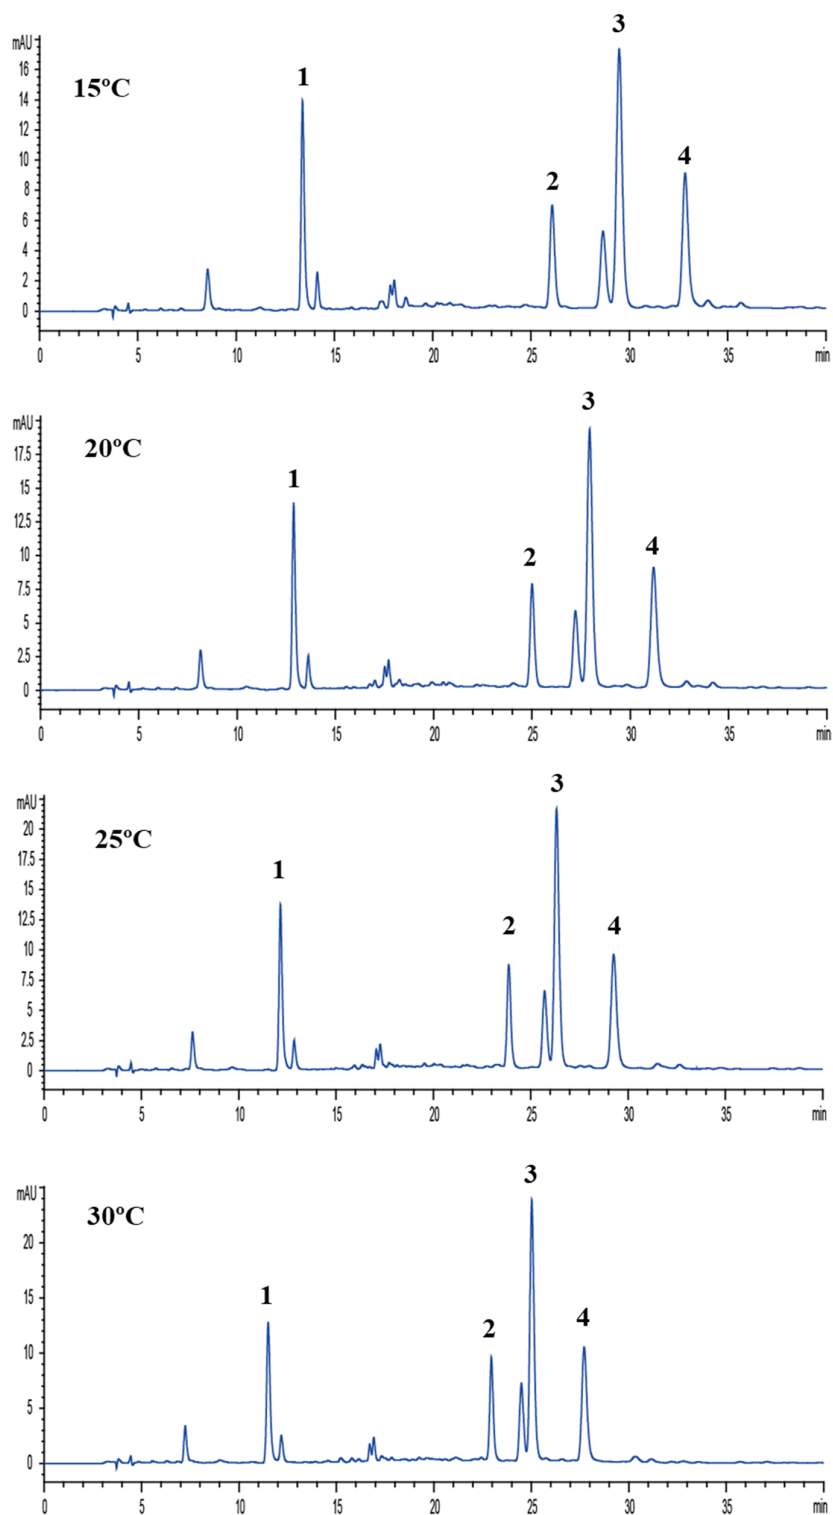

**Figure S1.** The HPLC chromatograms of *Artemisia argyi* leaves sample at different column temperatures. (1. 3-caffeoylquinic acid, 2. 3,4-di-O-caffeoylquinic acid, 3. 3,5-di-O-caffeoylquinic acid, 4. 4,5-di-O-caffeoylquinic acid)
